# Supplementary material for: Nanospheres from the self-assembly of an elastin-inspired triblock peptide
Source: Royal Society of Chemistry journal article supplement (doi:10.1039/c5ra21182d), 2015-01-01
Supplement: c5ra21182d1.pdf [file c5ra21182d1.pdf]

## **Nanospheres from the self-assembly of an elastin-based triblock peptide**

A. Scelsi<sup>a,b</sup>, B. Bochicchio<sup>a</sup>, A. Smith<sup>b</sup>, A. Saiani<sup>b</sup> and A. Pepe<sup>a\*</sup>,

<sup>a</sup>Laboratory of Protein-inspired Biomaterials, Department of Science, University of Basilicata, Via Ateneo Lucano 10, 85100 Potenza, Italy.

<sup>b</sup>School of Materials and Manchester Institute of Biotechnology, The University of Manchester, Oxford Road, Manchester, M13 9PL, U.K

Fax: (+39)0971205678; Tel: (+39)0971205481; E-mail: [antonietta.pepe@unibas.it](mailto:antonietta.pepe@unibas.it)

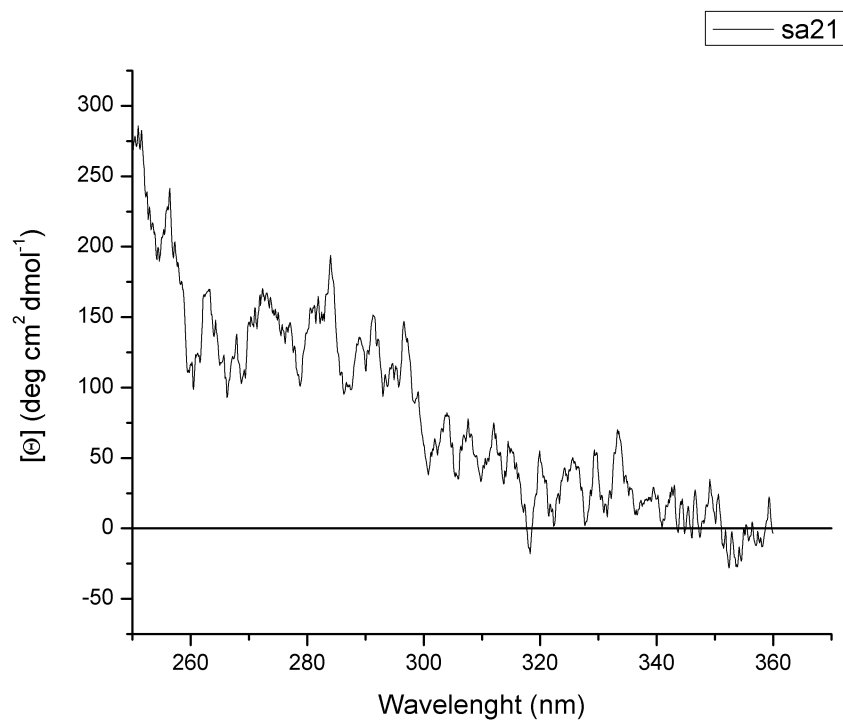

Figure S1: Near-UV CD spectrum of 0.5 mM SA21 peptide recorded in H<sub>2</sub>O/HFIP (1/1) at 25°C.

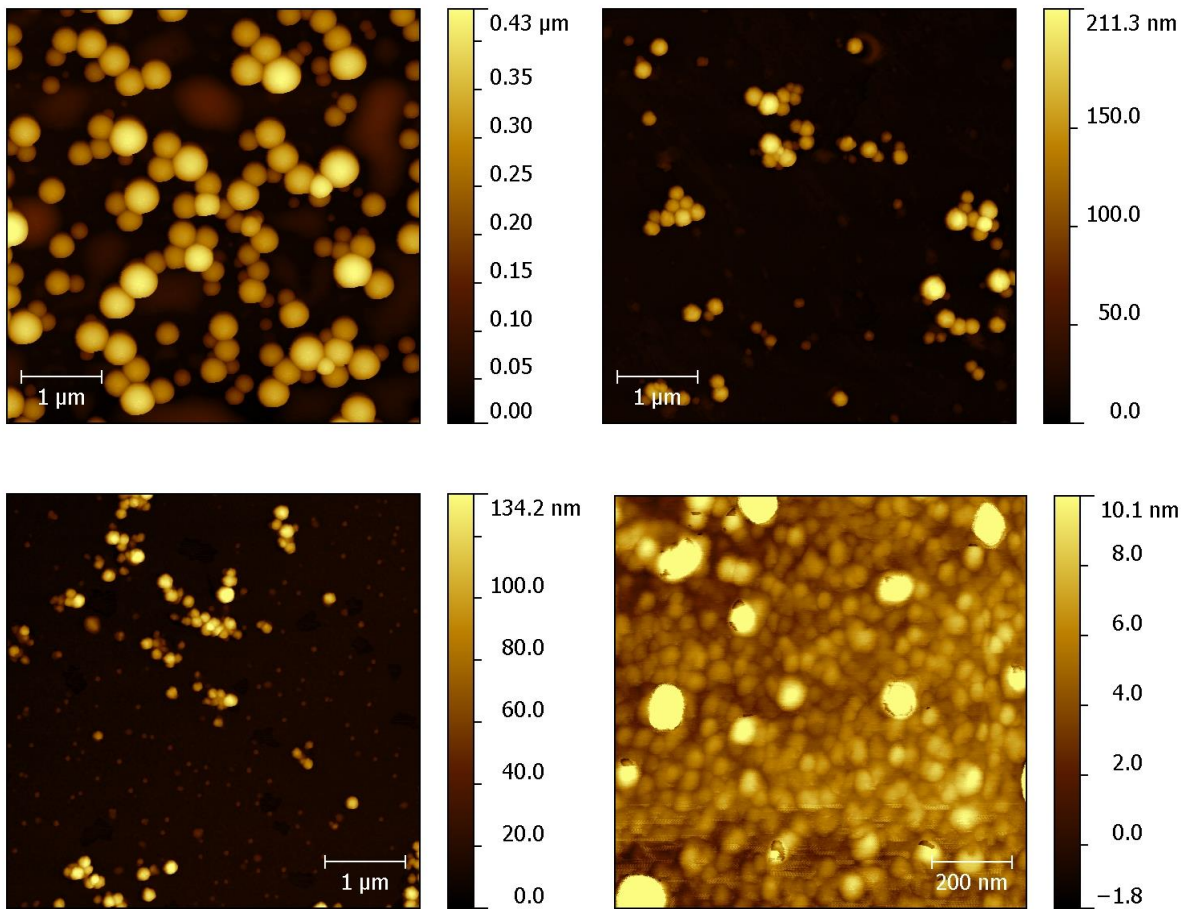

Figure S2: AFM images of SA21 peptide recorded after dilution of the 0.5 mM solution (a) to 0.1 mM (b), 0.05 mM (c) and 0.025 mM (d).

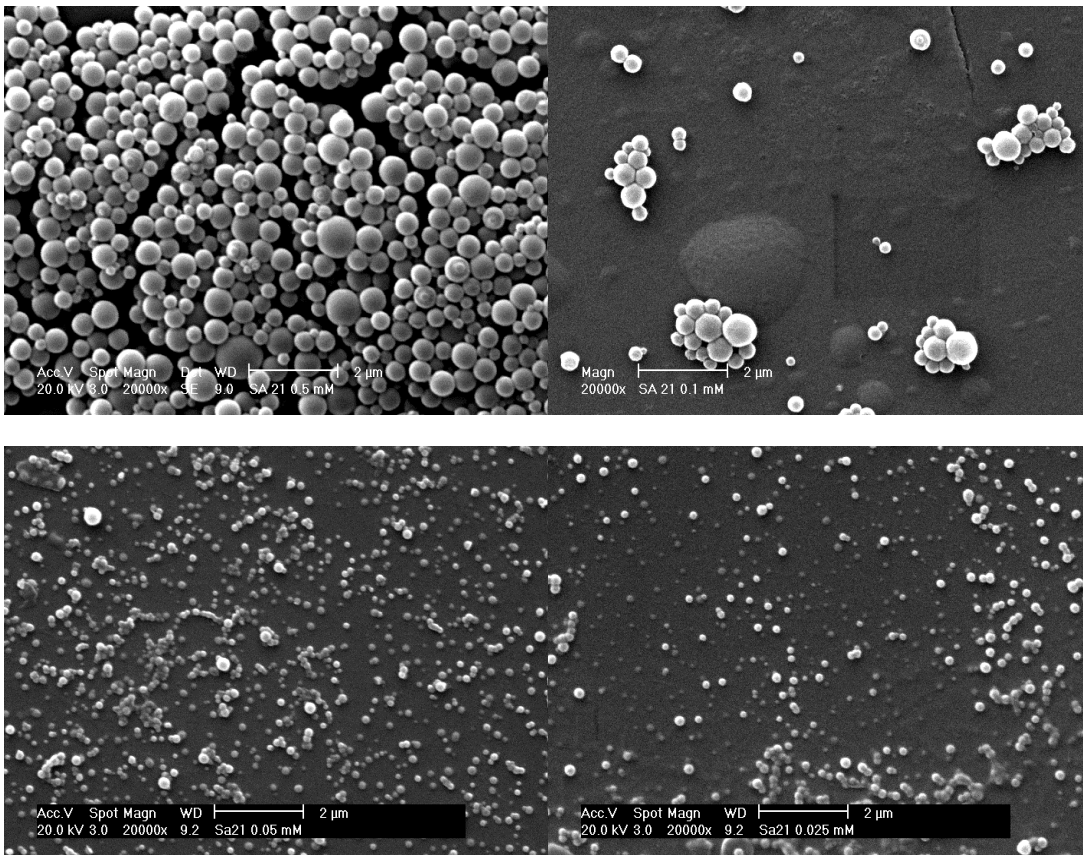

Figure S3: SEM images of nanosphere structures formed from SA21 peptide after dilution of the 0.5 mM solution (a) to 0.1 mM (b), 0.05 mM (c) and 0.025 mM (d).

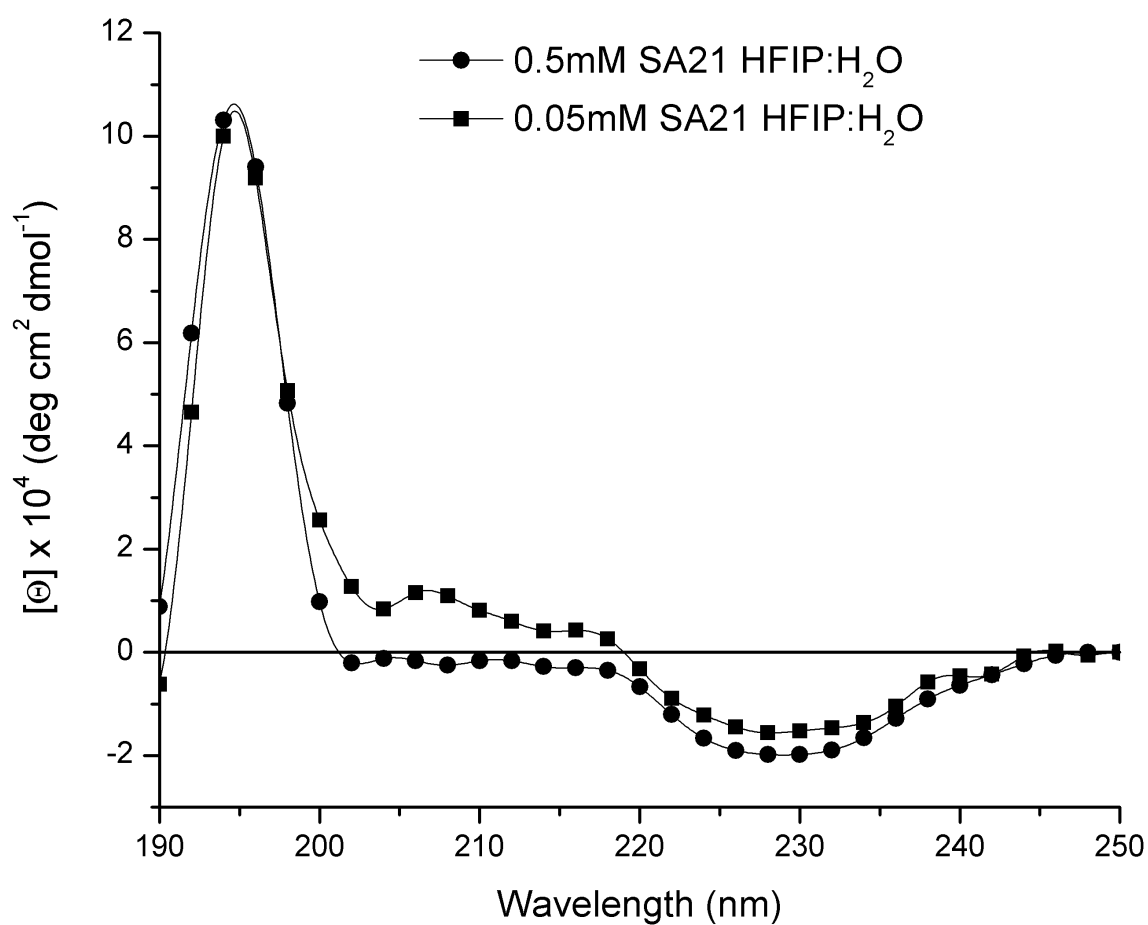

Figure S4: Far-UV CD spectra of SA21 peptide recorded at two different concentrations (0.5 mM, circle; 0.05 mM, squares).

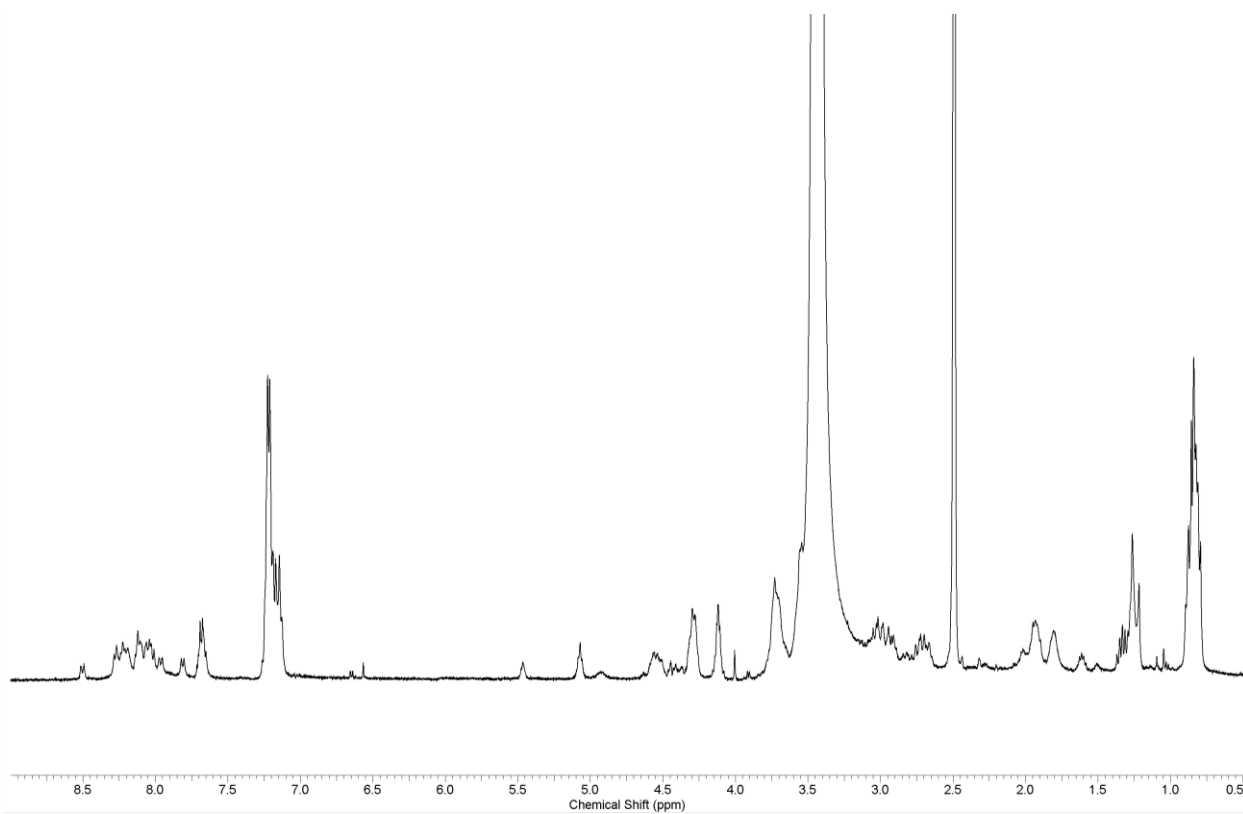

Figure S5:  $^1\text{H}$  NMR spectrum of SA21 peptide recorded in  $\text{DMSO-}d_6$  at 289 K.
